# Supplementary material for: Validation of a novel direct-injection chemiluminescence-based method for N-nitrosamine analysis in advanced-treated recycled water, drinking water, and wastewater
Source: Royal Society of Chemistry journal article supplement (doi:10.1039/c9ew00943d), 2020-01-01
Supplement: c9ew00943d1.pdf [file c9ew00943d1.pdf]

Supplementary Information

For

Validation of a Novel Direct-Injection Chemiluminescence-Based Method for N-Nitrosamine Analysis in  
Advanced-Treated Recycled Water, Drinking Water, and Wastewater

Shannon Roback<sup>1</sup>, Hitoshi Kodamatani<sup>2</sup>, Takahiro Fujioka<sup>3</sup>, Megan Plumlee<sup>1,\*</sup>

1. Orange County Water District, Research and Development Department, 18700 Ward St., Fountain Valley, CA 92708
2. Division of Earth and Environmental Science, Graduate School of Science and Engineering, Kagoshima University, 1-21-35 Korimoto, Kagoshima 890-0065, Japan
3. Nagasaki University, 1-14 Bunkyo-machi, Nagasaki 852-8521, Japan

Figure S1: HPLC-AEM-PR-CL

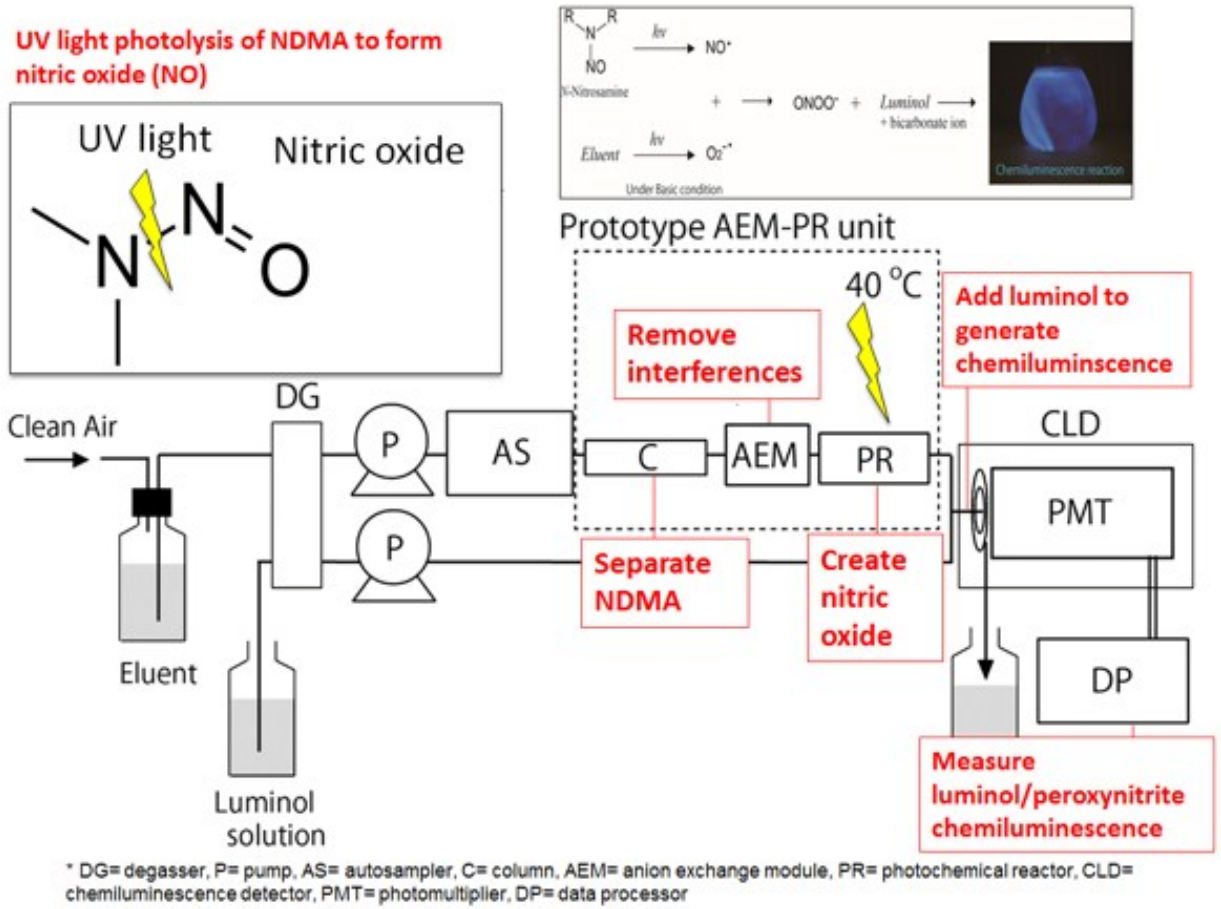

Table S1. Typical Water Quality During Sampling Period at OCWD's AWP

| Average Secondary Wastewater Effluent Water Quality Data |       |       |         |         |         |         |
|----------------------------------------------------------|-------|-------|---------|---------|---------|---------|
| Parameter                                                | Units | Count | Minimum | Maximum | Average | Std Dev |
| Biological oxygen demand                                 | mg/L  | 4     | 6.4     | 11      | 8.5     | 2.4     |
| Ca                                                       | mg/L  | 12    | 57.8    | 89.6    | 74.4    | 11.6    |
| Cl-                                                      | mg/L  | 12    | 244     | 298     | 272     | 18.4    |
| EC                                                       | um/cm | 83    | 1140    | 1720    | 1609.8  | 83.7    |
| Fe                                                       | ug/L  | 12    | 230     | 603     | 339.1   | 100.9   |
| MBAS*                                                    | mg/L  | 12    | 0.1     | 0.26    | 0.2     | 0.0     |
| Mg                                                       | mg/L  | 12    | 24.1    | 27.8    | 25.8    | 1.1     |
| Mn                                                       | ug/L  | 12    | 33.8    | 108     | 53.1    | 19.4    |
| NH3-N                                                    | mg/L  | 52    | 0.1     | 4.2     | 1.7     | 0.9     |
| NO2-N                                                    | mg/L  | 72    | 0.3     | 0.9     | 0.5     | 0.2     |
| NO3-N                                                    | mg/L  | 72    | 7.7     | 15.7    | 11.4    | 1.7     |

|                                                    |       |     |      |      |        |      |
|----------------------------------------------------|-------|-----|------|------|--------|------|
| Organic-N                                          | mg/L  | 52  | 0.0  | 2.5  | 1.0    | 0.6  |
| pH                                                 | UNITS | 72  | 6.9  | 7.4  | 7.2    | 0.1  |
| PO4-P                                              | mg/L  | 51  | 0.2  | 0.9  | 0.4    | 0.2  |
| SiO2                                               | mg/L  | 12  | 13.2 | 28.8 | 20.8   | 4.7  |
| SO4                                                | mg/L  | 12  | 162  | 223  | 189.3  | 18.6 |
| Suspended Solids                                   | mg/L  | 140 | 1.5  | 24   | 4.9    | 2.2  |
| Total Dissolved Solids                             | mg/L  | 51  | 822  | 1070 | 956.7  | 54   |
| Total Kjeldahl Nitrogen                            | mg/L  | 52  | 0.3  | 4.4  | 2.7    | 1    |
| Total Organic Carbon                               | mg/L  | 415 | 7.4  | 10.7 | 9      | 0.6  |
| Total Potassium                                    | mg/L  | 12  | 130  | 188  | 166.1  | 17.3 |
| Turbidity                                          | NTU   | 72  | 1.3  | 3.2  | 1.9    | 0.5  |
| <b>Average RO Feed Water Quality Data</b>          |       |     |      |      |        |      |
| Ca                                                 | mg/L  | 12  | 59.2 | 85.9 | 73.2   | 10   |
| Cl-                                                | mg/L  | 12  | 230  | 294  | 272.5  | 17.6 |
| EC                                                 | um/cm | 71  | 1160 | 1730 | 1615.9 | 96.3 |
| Fe                                                 | ug/L  | 12  | 105  | 165  | 130.8  | 20.3 |
| MBAS*                                              | mg/L  | 12  | 0.13 | 0.3  | 0.2    | 0.0  |
| Mg                                                 | mg/L  | 12  | 23.8 | 26.9 | 25.3   | 1.1  |
| Mn                                                 | ug/L  | 12  | 40.3 | 60.3 | 53.2   | 5.8  |
| NH3-N                                              | mg/L  | 20  | 0.7  | 3.9  | 2      | 0.9  |
| NO2-N                                              | mg/L  | 20  | 0.1  | 1.8  | 0.5    | 0.4  |
| NO3-N                                              | mg/L  | 20  | 9.4  | 13.3 | 10.9   | 1.0  |
| Organic-N                                          | mg/L  | 20  | 0.0  | 1.7  | 0.6    | 0.6  |
| pH                                                 | UNITS | 72  | 6.9  | 7.6  | 7.1    | 0.1  |
| SiO2                                               | mg/L  | 12  | 14.2 | 27.7 | 20.6   | 3.8  |
| SO4                                                | mg/L  | 12  | 172  | 235  | 197.3  | 17.7 |
| Total Dissolved Solids                             | mg/L  | 52  | 852  | 1100 | 984.7  | 51.7 |
| Total Kjeldahl Nitrogen                            | mg/L  | 20  | 0.7  | 3.8  | 2.5    | 0.9  |
| Total Organic Carbon                               | mg/L  | 366 | 6.0  | 10.8 | 8      | 0.5  |
| Total Potassium                                    | mg/L  | 12  | 129  | 166  | 150.8  | 11.8 |
| Total Cl2                                          | mg/L  | 72  | 1.3  | 3.1  | 2.1    | 0.4  |
| <b>Average Finished Product Water Quality Data</b> |       |     |      |      |        |      |
| Ca                                                 | mg/L  | 53  | 10.6 | 14.8 | 13.2   | 0.9  |
| Cl-                                                | mg/L  | 13  | 4    | 6.5  | 5.1    | 0.8  |
| EC                                                 | um/cm | 362 | 66   | 116  | 96     | 6.7  |
| Fe                                                 | ug/L  | 5   | 0.1  | 0.5  | 0.3    | 0.2  |
| MBAS*                                              | mg/L  | 5   | 0.0  | 0.0  | 0.0    | 0    |
| Mg                                                 | mg/L  | 13  | 0.1  | 0.1  | 0.05   | 0    |
| Mn                                                 | ug/L  | 5   | 0.1  | 0.1  | 0.1    | 0    |
| NH3-N                                              | mg/L  | 116 | 0.0  | 0.6  | 0.2    | 0.1  |

|                         |       |     |      |      |      |     |
|-------------------------|-------|-----|------|------|------|-----|
| NO2-N                   | mg/L  | 116 | 0    | 0.1  | 0.0  | 0.0 |
| NO3-N                   | mg/L  | 116 | 0.6  | 1.5  | 1    | 0.1 |
| Organic-N               | mg/L  | 116 | 0.0  | 0.2  | 0.0  | 0.0 |
| pH                      | UNITS | 73  | 6.9  | 8.7  | 7.8  | 0.3 |
| PO4-P                   | mg/L  | 5   | 0.0  | 0.0  | 0.0  | 0   |
| SiO2                    | mg/L  | 5   | 0.1  | 1.2  | 0.3  | 0.5 |
| SO4                     | mg/L  | 13  | 0.1  | 0.7  | 0.5  | 0.2 |
| Total Dissolved Solids  | mg/L  | 53  | 40   | 66.5 | 49.9 | 5.5 |
| Total Kjeldahl Nitrogen | mg/L  | 116 | 0.0  | 0.5  | 0.1  | 0.1 |
| Total Organic Carbon    | mg/L  | 364 | 0.0  | 0.3  | 0.1  | 0.0 |
| Total Potassium         | mg/L  | 53  | 29.5 | 42   | 35.6 | 2.7 |
| Total Cl2               | mg/L  | 5   | 0.7  | 1.1  | 0.9  | 0.1 |

\*MBAS assay, is a colorimetric analysis test method that uses methylene blue to detect the presence of anionic surfactants (such as a detergent or foaming agent)

**Table S2. N-nitrosamine concentrations in 20 ng/L N-nitrosamine spiked samples used to calculate accuracy and precision**

| Milli-Q    |            |             |             |             |             |             |             |             |             |
|------------|------------|-------------|-------------|-------------|-------------|-------------|-------------|-------------|-------------|
| Sample #   | true value | conc. NDMA  | Recovery    | conc. NMOR  | Recovery    | conc. NMEA  | Recovery    | conc. NPYR  | Recovery    |
| 1          | 20         | 20.0        | 100%        | 21.2        | 106%        | 24.9        | 125%        | 21.3        | 107%        |
| 2          | 20         | 20.5        | 102%        | 20.7        | 103%        | 25.8        | 129%        | 25.3        | 126%        |
| 3          | 20         | 20.2        | 101%        | 20.8        | 104%        | 23.2        | 116%        | 25.1        | 126%        |
| 4          | 20         | 20.2        | 101%        | 20.3        | 102%        | 25.6        | 128%        | 27.1        | 136%        |
| 5          | 20         | 20.6        | 103%        | 21.4        | 107%        | 24.6        | 123%        | 25.9        | 129%        |
| <b>ave</b> |            | <b>20.3</b> | <b>102%</b> | <b>20.9</b> | <b>104%</b> | <b>24.8</b> | <b>124%</b> | <b>24.9</b> | <b>125%</b> |
| <b>SD</b>  |            | <b>0.2</b>  |             | <b>0.4</b>  |             | <b>1.0</b>  |             | <b>2.2</b>  |             |
| <b>RSD</b> |            | <b>1%</b>   |             | <b>2%</b>   |             | <b>4%</b>   |             | <b>9%</b>   |             |
| Q1         |            |             |             |             |             |             |             |             |             |
| 1          | 20         | 15.7        | 78%         | 23.5        | 118%        | 13.9        | 69%         | 17.7        | 89%         |
| 2          | 20         | 22.2        | 111%        | 20.1        | 101%        | 16.0        | 80%         | 15.4        | 77%         |
| 3          | 20         | 17.0        | 85%         | 21.3        | 107%        | 13.7        | 68%         | 13.2        | 66%         |
| 4          | 20         | 16.3        | 81%         | 18.2        | 91%         | 14.7        | 73%         | 13.8        | 69%         |
| 5          | 20         | 17.8        | 89%         | 22.3        | 112%        | 18.2        | 91%         | 12.8        | 64%         |
| <b>ave</b> |            | <b>17.8</b> | <b>89%</b>  | <b>21.1</b> | <b>105%</b> | <b>15.3</b> | <b>76%</b>  | <b>14.6</b> | <b>73%</b>  |
| <b>SD</b>  |            | <b>2.6</b>  |             | <b>2.0</b>  |             | <b>1.9</b>  |             | <b>2.0</b>  |             |
| <b>RSD</b> |            | <b>14%</b>  |             | <b>10%</b>  |             | <b>12%</b>  |             | <b>14%</b>  |             |
| ROF        |            |             |             |             |             |             |             |             |             |
| 1          | 20         | 18.6        | 93%         | 22.2        | 111%        | 19.7        | 98%         | 11.9        | 59%         |
| 2          | 20         | 21.1        | 105%        | 21.3        | 106%        | 21.3        | 106%        | NA          | NA          |
| 3          | 20         | 25.0        | 125%        | 21.3        | 107%        | 21.5        | 108%        | 17.7        | 88%         |
| 4          | 20         | 20.8        | 104%        | 21.1        | 105%        | 22.2        | 111%        | 13.7        | 68%         |
| 5          | 20         | 20.1        | 101%        | 22.4        | 112%        | 24.3        | 121%        | 15.0        | 75%         |
| <b>ave</b> |            | <b>21.1</b> | <b>106%</b> | <b>21.7</b> | <b>108%</b> | <b>21.8</b> | <b>109%</b> | <b>14.6</b> | <b>73%</b>  |
| <b>SD</b>  |            | <b>2.4</b>  |             | <b>0.6</b>  |             | <b>1.7</b>  |             | <b>2.5</b>  |             |
| <b>RSD</b> |            | <b>11%</b>  |             | <b>3%</b>   |             | <b>8%</b>   |             | <b>17%</b>  |             |
| FPW        |            |             |             |             |             |             |             |             |             |
| 1          | 20         | 19.1        | 95%         | 21.6        | 108%        | 25.8        | 129%        | 27.8        | 139%        |
| 2          | 20         | 19.0        | 95%         | 19.2        | 96%         | 23.0        | 115%        | 23.3        | 117%        |
| 3          | 20         | 19.8        | 99%         | 20.6        | 103%        | 26.4        | 132%        | 26.1        | 131%        |
| 4          | 20         | 20.4        | 102%        | 19.8        | 99%         | 26.0        | 130%        | 25.8        | 129%        |
| 5          | 20         | 20.0        | 100%        | 21.6        | 108%        | 24.6        | 123%        | 23.5        | 118%        |
| <b>ave</b> |            | <b>19.7</b> | <b>98%</b>  | <b>20.6</b> | <b>103%</b> | <b>25.2</b> | <b>126%</b> | <b>25.3</b> | <b>127%</b> |
| <b>SD</b>  |            | <b>0.6</b>  |             | <b>1.1</b>  |             | <b>1.4</b>  |             | <b>1.9</b>  |             |
| <b>RSD</b> |            | <b>3%</b>   |             | <b>5%</b>   |             | <b>6%</b>   |             | <b>7%</b>   |             |

\*Q1= Secondary Wastewater Effluent



|     |     |  |  |  |  |  |  |  |  |  |
|-----|-----|--|--|--|--|--|--|--|--|--|
| 1.8 | 1.8 |  |  |  |  |  |  |  |  |  |
| 1.8 | 1.8 |  |  |  |  |  |  |  |  |  |

NPYR

|   |     |     |       |       |     |      |     |     |       |      |
|---|-----|-----|-------|-------|-----|------|-----|-----|-------|------|
| 3 | 3.4 |     |       |       |     |      |     |     |       |      |
| 3 | 2.6 |     |       |       |     |      |     |     |       |      |
| 3 | 2.6 |     |       |       |     |      |     |     |       |      |
| 3 | 3.1 | 3.1 | 0.363 | 1.439 | 4.5 | 150% | 54% | no  | 3.707 | 1.35 |
| 3 | 3.5 |     |       |       |     |      |     |     |       |      |
| 3 | 3.2 |     |       |       |     |      |     |     |       |      |
| 3 | 3.1 |     |       |       |     |      |     |     |       |      |
| 5 | 4.3 |     |       |       |     |      |     |     |       |      |
| 5 | 5.0 |     |       |       |     |      |     |     |       |      |
| 5 | 4.5 |     |       |       |     |      |     |     |       |      |
| 5 | 4.8 | 4.7 | 0.267 | 1.058 | 5.7 | 115% | 73% | yes | 3.707 | 0.99 |
| 5 | 4.9 |     |       |       |     |      |     |     |       |      |
| 5 | 4.4 |     |       |       |     |      |     |     |       |      |
| 5 | 4.9 |     |       |       |     |      |     |     |       |      |

NMEA

|   |     |     |       |       |     |      |      |     |       |      |
|---|-----|-----|-------|-------|-----|------|------|-----|-------|------|
| 3 | 5.8 |     |       |       |     |      |      |     |       |      |
| 3 | 5.8 |     |       |       |     |      |      |     |       |      |
| 3 | 6.3 |     |       |       |     |      |      |     |       |      |
| 3 | 6.5 | 5.9 | 0.671 | 2.660 | 8.6 | 287% | 110% | no  | 3.707 | 2.49 |
| 3 | 4.6 |     |       |       |     |      |      |     |       |      |
| 3 | 6.1 |     |       |       |     |      |      |     |       |      |
| 3 | 6.5 |     |       |       |     |      |      |     |       |      |
| 5 | 6.6 |     |       |       |     |      |      |     |       |      |
| 5 | 6.3 | 6.1 | 0.306 | 1.212 | 7.4 | 147% | 99%  | yes | 3.707 | 1.13 |

|       |     |
|-------|-----|
| 5     | 5.8 |
| <hr/> |     |
| 5     | 5.8 |
| <hr/> |     |
| 5     | 6.0 |
| <hr/> |     |
| 5     | 6.2 |
| <hr/> |     |
| 5     | 6.4 |

---

**Text S1: Additional samples for four participating utilities.**

The water samples consisted of:

- Utility 1 – 13 drinking water samples collected on one occasion
- Utility 2 – 23 tertiary recycled water samples collected on 12 different occasions
- Utility 3 – 4 advanced treated potable reuse water samples collected on one occasion
- Utility 4 – 24 secondary treated wastewater (Orange County Sanitation District) samples collected on six different occasions

The samples from Utility 3 and Utility 4 were also analyzed by the Orange County Water District (OCWD) Philip L. Anthony Water Quality Laboratory resulting in a three-way split.

Text S2: *N*-nitrosamine analytical method for OCWD Analytical Laboratory

The method employs an isotopic dilution technique for the calculation of results - using NDMA-d<sub>6</sub> and NMOR-d<sub>8</sub> as the surrogate. One liter of sample is extracted with methylene chloride in a separatory funnel. The methylene chloride extract is concentrated to a volume of 1 mL. Analysis is performed by a GC/MS system equipped with an ion trap detector using methanol chemical ionization.



**Table S4. N-nitrosamine analytical methods used in split sampling campaigns.**

| Laboratory       | Method             | Extraction                         | Instrument     | MDL     |
|------------------|--------------------|------------------------------------|----------------|---------|
| OCWD Laboratory  | Internal method    | liquid-liquid with MC <sup>a</sup> | GC/MS ion trap | 2 ng/L  |
| Utility 1        | Modified EPA 521   | coconut charcoal SPE               | GC/MS/MS       | 2 ng/L  |
| Utility 2        | Modified EPA 1625B | coconut charcoal SPE               | GC/MS          | 50 µg/L |
| Utility 3        | EPA 521            | coconut charcoal SPE               | GC/MS/MS       | 2 ng/L  |
| Utility 4 (OCSD) | Internal method    | liquid-liquid with MC              | GC/MS          | 5 ng/L  |

<sup>a</sup>MC- methylene chloride

**Table S5. Wastewater split samples**

| Date       | Lab   | Sample location NDMA (ng/L) |             |             |                  |
|------------|-------|-----------------------------|-------------|-------------|------------------|
|            |       | Plant 1 effluent            | P1 Filtrate | P2 Filtrate | Plant 2 effluent |
| 5/24-25/17 | OCSD  | 17.4                        | 37.7        | 199         | 54.8             |
|            | AWQAL | 15.1                        | 19.2        | 333         | 39.9             |
|            | R&D   | 15.7                        | 42.3        | 226.5       | 38.5             |
| 5/30-31/17 | OCSD  | 34.6                        | 40.4        | 260         | 26.1             |
|            | AWQAL | 28.2                        | 33.6        | 229         | 12.6             |
|            | R&D   | 26.3                        | 68.9        | 445.2       | 23.1             |
| 6/6-7/17   | OCSD  | 40.6                        | 104         | 257         | 37.3             |
|            | AWQAL | 30.1                        | 40          | 138         | 23.5             |
|            | R&D   | 35.2                        | 67.3        | 4825.8      | 24.7             |
| 6/12-13/17 | OCSD  | 37                          | 3180        | 3380        | 25.5             |
|            | AWQAL | 18.8                        | 25.8        | 138         | 16.4             |
|            | R&D   | 18.8                        | 45.8        | 1385.7      | 20               |
| 6/22-23/17 | OCSD  | 39.6                        | 83.24       | 247.82      | 43.96            |
|            | AWQAL | 20.3                        | 27.7        | 499.3       | 16.9             |
|            | R&D   | 23.3                        | 57.7        | 1277.4      | 20.9             |

|                |       |       |       |        |       |
|----------------|-------|-------|-------|--------|-------|
| 6/29-<br>30/17 | OCS   | 30.36 | 64.23 | 168.09 | 17.76 |
|                | AWQAL | 16.5  | 19.8  | 31.3   | 10.1  |
|                | R&D   | 21.4  | 18.6  | 296.2  | 28.3  |
